# Supplementary material for: Quality of Care in US NICUs by Race and Ethnicity
Source: Oxford University Press journal article supplement (doi:10.1542/peds.2020-037622), 2021-07-22
Supplement: peds_2020037622supplementarydata.pdf [file peds_2020037622supplementarydata.pdf]

## Supplemental Materials

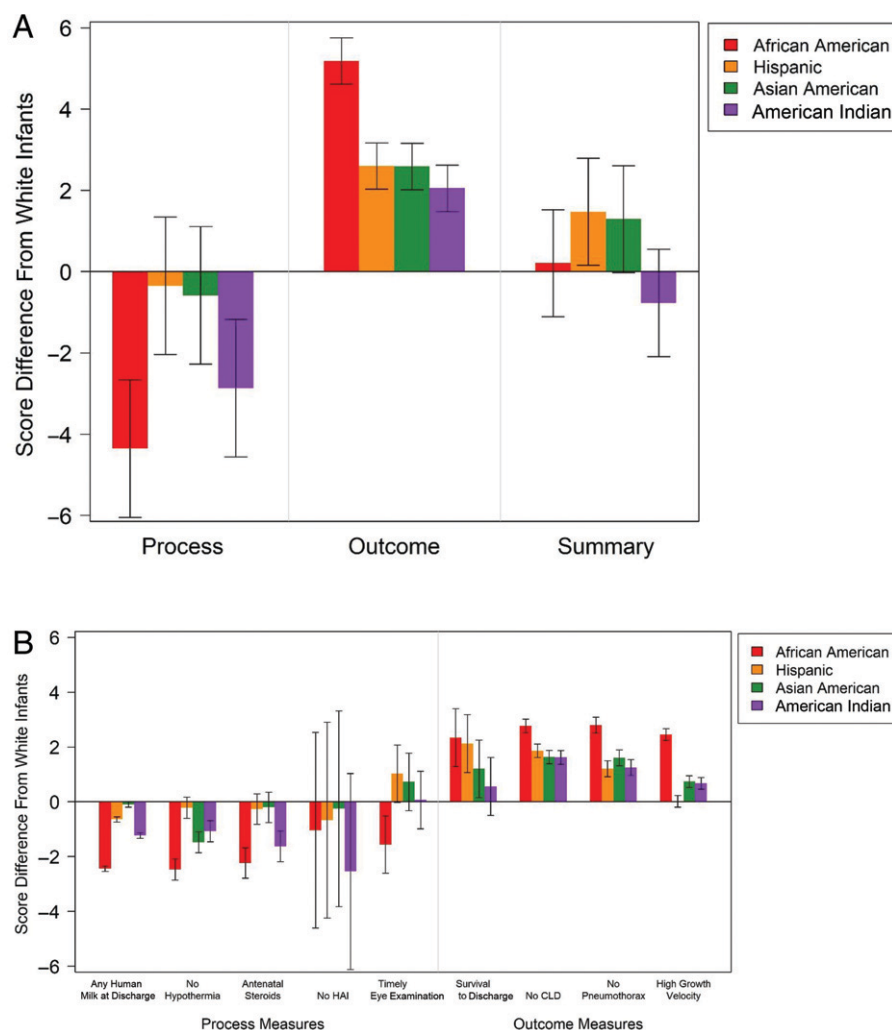

### SUPPLEMENTAL FIGURE 4

Baby-MONITOR subcomponent scores for each US Census Division by race and ethnicity compared to white infants in the same Census Division. A, Point estimates and 99% compatibility intervals indicated with error bars for Baby-MONITOR scores for African American infants compared with white infants. Positive scores indicate that African American infants scored better than white infants. B, Point estimates and 99% compatibility intervals indicated with error bars for Baby-MONITOR scores for Hispanic infants compared with white infants. Positive scores indicate that Hispanic infants scored better than white infants. C, Point estimates and 99% compatibility intervals indicated with error bars for Baby-MONITOR scores for Asian American infants compared with white infants. Positive scores indicate that Asian American infants scored better than white infants. D, Point estimates and 99% compatibility intervals indicated with error bars for Baby-MONITOR scores for American Indian infants compared with white infants. Positive scores indicate that American Indian infants scored better than white infants. CLD, chronic lung disease; ENC, East North Central (IL, IN, MI, OH, WI); ESC, East South Central (AL, MS, KY, TN); HAI, hospital-acquired infection; M, Mountain (AZ, CO, ID, MT, NM, NV, UT, WY); MA, Middle Atlantic (NJ, NY, PA); NE, New England (CT, MA, ME, NH, VT); P, Pacific (AK, CA, HI, OR, WA); SA, South Atlantic (DC, FL, GA, MD, NC, SC, WV, VA); WNC, West North Central (IA, KS, MN, MO, ND, NE, SD); WSC, West South Central (AR, LA, OK, TX).

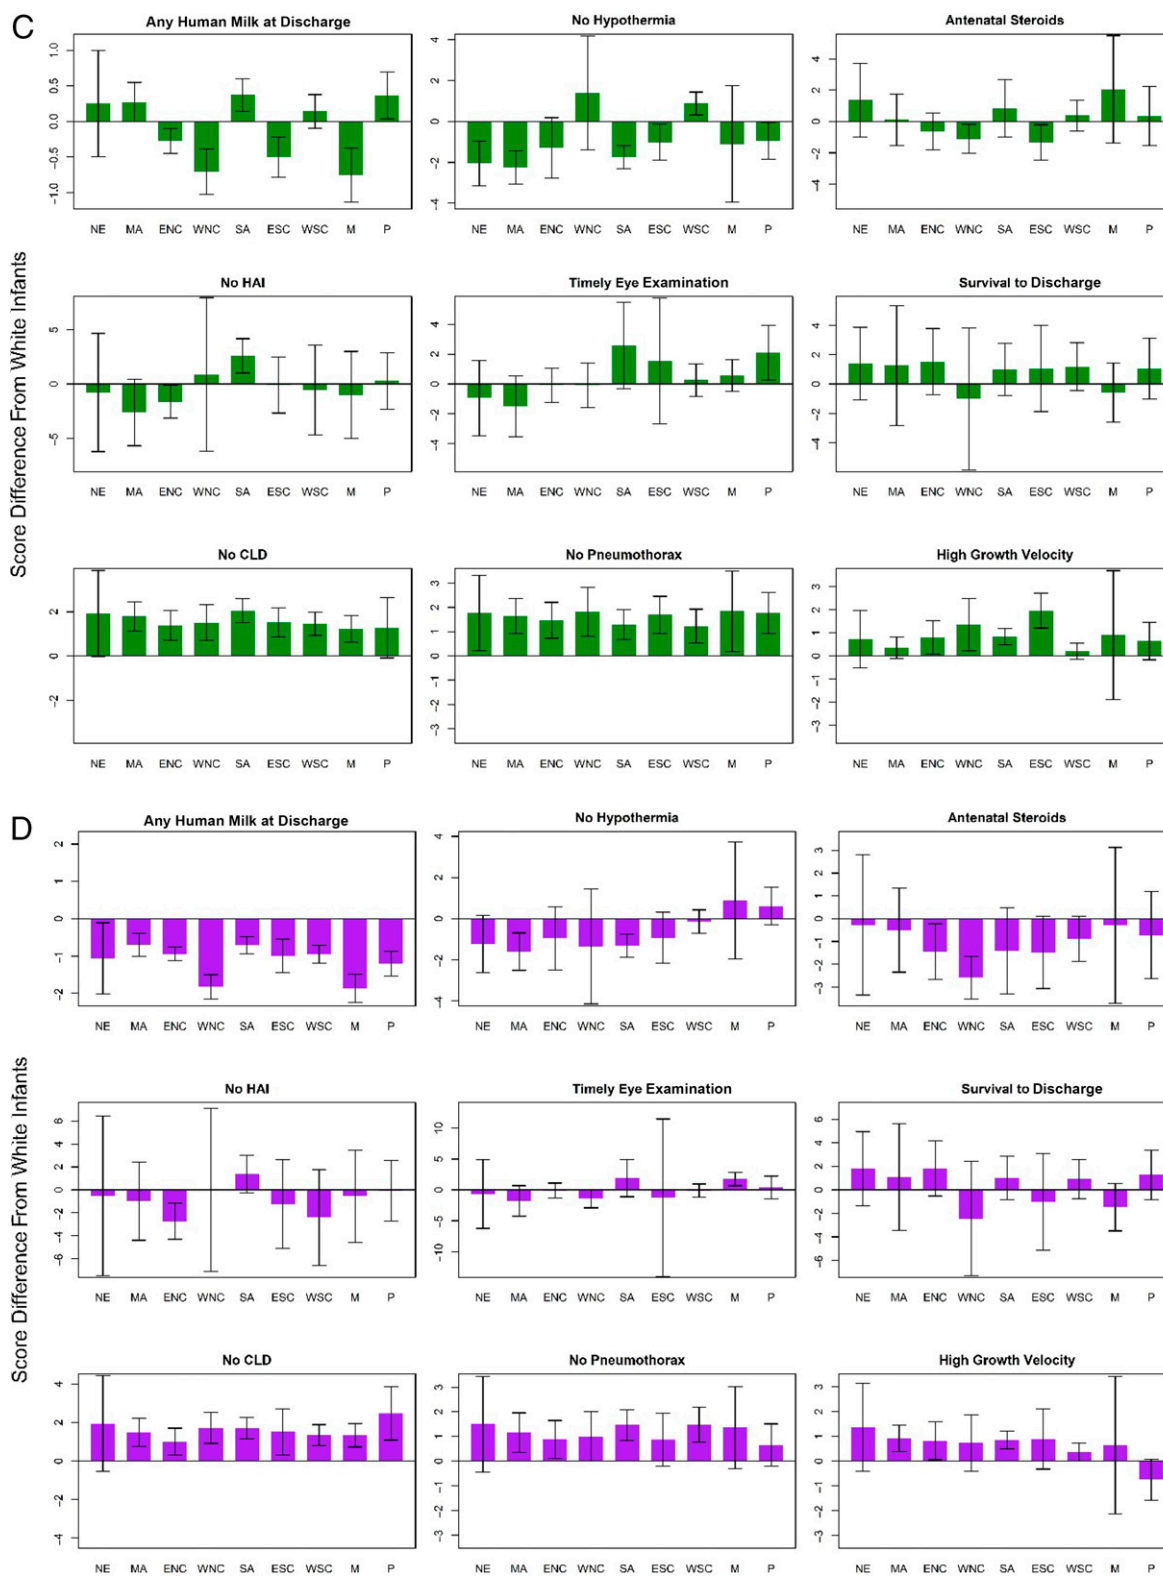

**SUPPLEMENTAL FIGURE 4**

Continued.

**SUPPLEMENTAL TABLE 4** Baby-MONITOR Summary, Process, and Outcome Scores by Race and Ethnicity Compared With White Infants, Including Early Deaths

| Measure and Race and Ethnicity | Race and Ethnicity Overall Compared With White Infants |                             | Race and Ethnicity Within NICU Compared With White Infants in the Same NICU |                                  |
|--------------------------------|--------------------------------------------------------|-----------------------------|-----------------------------------------------------------------------------|----------------------------------|
|                                | No. Infants                                            | Baby-MONITOR Score (99% CI) | No. NICUs                                                                   | Mean Baby-MONITOR Score (99% CI) |
| Summary                        |                                                        |                             |                                                                             |                                  |
| African American               | 52565                                                  | 0.3 (−1.0 to 1.6)           | 696                                                                         | 0.25 (0.10 to 0.40)              |
| Hispanic                       | 31794                                                  | 1.4 (0.1 to 2.7)            | 694                                                                         | 0.21 (0.06 to 0.37)              |
| Asian American                 | 9002                                                   | 1.3 (0.0 to 2.6)            | 591                                                                         | 0.32 (0.16 to 0.49)              |
| American Indian                | 1439                                                   | −0.8 (−2.1 to 0.5)          | 180                                                                         | 0.01 (−0.33 to 0.34)             |
| Process                        |                                                        |                             |                                                                             |                                  |
| African American               | 52559                                                  | −4.4 (−6.1 to −2.7)         | 698                                                                         | −0.65 (−0.81 to −0.50)           |
| Hispanic                       | 31791                                                  | −0.4 (−2.1 to 1.3)          | 699                                                                         | −0.13 (−0.27 to 0.02)            |
| Asian American                 | 9000                                                   | −0.6 (−2.3 to 1.1)          | 596                                                                         | −0.11 (−0.27 to 0.04)            |
| American Indian                | 1439                                                   | −2.9 (−4.6 to −1.2)         | 186                                                                         | −0.46 (−0.78 to −0.13)           |
| Outcome                        |                                                        |                             |                                                                             |                                  |
| African American               | 52559                                                  | 5.3 (4.8 to 5.8)            | 704                                                                         | 1.10 (0.94 to 1.26)              |
| Hispanic                       | 31790                                                  | 2.4 (1.9 to 3.0)            | 701                                                                         | 0.45 (0.30 to 0.61)              |
| Asian American                 | 9002                                                   | 2.6 (2.1 to 3.1)            | 626                                                                         | 0.61 (0.44 to 0.78)              |
| American Indian                | 1439                                                   | 2.0 (1.5 to 2.6)            | 216                                                                         | 0.52 (0.22 to 0.83)              |

**SUPPLEMENTAL TABLE 5** Baby-MONITOR Measure Scores by Race and Ethnicity Compared With White Infants, Including Early Deaths

| Measure and Race and Ethnicity | Race and Ethnicity Overall Compared With White Infants |                             | Race and Ethnicity Within NICU Compared With White Infants in the Same NICU |                                  |
|--------------------------------|--------------------------------------------------------|-----------------------------|-----------------------------------------------------------------------------|----------------------------------|
|                                | No. Infants                                            | Baby-MONITOR Score (99% CI) | No. NICUs                                                                   | Mean Baby-MONITOR Score (99% CI) |
| Any human milk at discharge    |                                                        |                             |                                                                             |                                  |
| African American               | 48802                                                  | −2.4 (−2.5 to −2.3)         | 707                                                                         | −1.03 (−1.16 to −0.89)           |
| Hispanic                       | 29761                                                  | −0.6 (−0.7 to −0.5)         | 711                                                                         | −0.25 (−0.37 to −0.14)           |
| Asian American                 | 8434                                                   | −0.1 (−0.2 to 0.0)          | 642                                                                         | −0.10 (−0.21 to 0.02)            |
| American Indian                | 1326                                                   | −1.2 (−1.3 to −1.1)         | 233                                                                         | −0.77 (−1.03 to −0.50)           |
| No hypothermia                 |                                                        |                             |                                                                             |                                  |
| African American               | 51332                                                  | −2.5 (−2.9 to −2.1)         | 711                                                                         | −0.24 (−0.35 to −0.14)           |
| Hispanic                       | 31266                                                  | −0.2 (−0.6 to 0.2)          | 715                                                                         | −0.03 (−0.13 to 0.07)            |
| Asian American                 | 8849                                                   | −1.5 (−1.9 to −1.1)         | 651                                                                         | −0.12 (−0.25 to 0.01)            |
| American Indian                | 1409                                                   | −1.1 (−1.4 to −0.7)         | 236                                                                         | −0.02 (−0.30 to 0.26)            |
| Antenatal steroids             |                                                        |                             |                                                                             |                                  |
| African American               | 50522                                                  | −2.3 (−2.8 to −1.7)         | 712                                                                         | −0.17 (−0.31 to −0.04)           |
| Hispanic                       | 30656                                                  | −0.3 (−0.9 to 0.2)          | 715                                                                         | −0.04 (−0.18 to 0.10)            |
| Asian American                 | 8485                                                   | −0.3 (−0.8 to 0.3)          | 648                                                                         | −0.01 (−0.15 to 0.13)            |
| American Indian                | 1373                                                   | −1.6 (−2.2 to −1.1)         | 231                                                                         | −0.20 (−0.48 to 0.09)            |
| No hospital-acquired infection |                                                        |                             |                                                                             |                                  |
| African American               | 51526                                                  | −1.0 (−4.6 to 2.6)          | 708                                                                         | 0.03 (−0.11 to 0.17)             |
| Hispanic                       | 31104                                                  | −0.7 (−4.2 to 2.9)          | 712                                                                         | 0.01 (−0.13 to 0.15)             |
| Asian American                 | 8849                                                   | −0.2 (−3.8 to 3.3)          | 649                                                                         | −0.02 (−0.17 to 0.13)            |
| American Indian                | 1398                                                   | −2.5 (−6.1 to 1.0)          | 235                                                                         | −0.06 (−0.32 to 0.20)            |
| Timely eye examination         |                                                        |                             |                                                                             |                                  |
| African American               | 37458                                                  | −1.6 (−2.6 to −0.5)         | 699                                                                         | −0.04 (−0.16 to 0.09)            |
| Hispanic                       | 23012                                                  | 1.0 (0.0 to 2.1)            | 699                                                                         | 0.03 (−0.10 to 0.15)             |
| Asian American                 | 6023                                                   | 0.7 (−0.3 to 1.8)           | 600                                                                         | 0.07 (−0.07 to 0.21)             |
| American Indian                | 996                                                    | 0.1 (−1.0 to 1.1)           | 187                                                                         | −0.04 (−0.32 to 0.24)            |
| Survival to discharge          |                                                        |                             |                                                                             |                                  |
| African American               | 52329                                                  | 2.6 (1.7 to 3.5)            | 712                                                                         | 0.31 (0.16 to 0.46)              |
| Hispanic                       | 31694                                                  | 1.8 (0.9 to 2.7)            | 715                                                                         | 0.20 (0.04 to 0.35)              |
| Asian American                 | 8981                                                   | 1.2 (0.3 to 2.1)            | 656                                                                         | 0.20 (0.03 to 0.36)              |
| American Indian                | 1431                                                   | 0.6 (−0.3 to 1.5)           | 236                                                                         | 0.04 (−0.23 to 0.31)             |

**SUPPLEMENTAL TABLE 5** Continued

| Measure and Race and Ethnicity | Race and Ethnicity Overall Compared With White Infants |                             | Race and Ethnicity Within NICU Compared With White Infants in the Same NICU |                                  |
|--------------------------------|--------------------------------------------------------|-----------------------------|-----------------------------------------------------------------------------|----------------------------------|
|                                | No. Infants                                            | Baby-MONITOR Score (99% CI) | No. NICUs                                                                   | Mean Baby-MONITOR Score (99% CI) |
| No chronic lung disease        |                                                        |                             |                                                                             |                                  |
| African American               | 49450                                                  | 2.8 (2.5 to 3.0)            | 708                                                                         | 0.52 (0.40 to 0.64)              |
| Hispanic                       | 30015                                                  | 1.9 (1.6 to 2.1)            | 712                                                                         | 0.32 (0.20 to 0.44)              |
| Asian American                 | 8525                                                   | 1.6 (1.4 to 1.9)            | 645                                                                         | 0.31 (0.17 to 0.46)              |
| American Indian                | 1329                                                   | 1.6 (1.4 to 1.9)            | 232                                                                         | 0.36 (0.06 to 0.65)              |
| No pneumothorax                |                                                        |                             |                                                                             |                                  |
| African American               | 52379                                                  | 2.8 (2.5 to 3.1)            | 712                                                                         | 0.73 (0.57 to 0.89)              |
| Hispanic                       | 31683                                                  | 1.2 (0.9 to 1.5)            | 716                                                                         | 0.33 (0.18 to 0.49)              |
| Asian American                 | 8975                                                   | 1.6 (1.3 to 1.9)            | 654                                                                         | 0.45 (0.29 to 0.61)              |
| American Indian                | 1433                                                   | 1.2 (0.9 to 1.5)            | 239                                                                         | 0.50 (0.19 to 0.81)              |
| High growth velocity           |                                                        |                             |                                                                             |                                  |
| African American               | 43291                                                  | 2.5 (2.2 to 2.7)            | 704                                                                         | 0.63 (0.51 to 0.75)              |
| Hispanic                       | 26439                                                  | 0.0 (−0.2 to 0.2)           | 701                                                                         | 0.02 (−0.11 to 0.15)             |
| Asian American                 | 7521                                                   | 0.7 (0.5 to 1.0)            | 626                                                                         | 0.20 (0.07 to 0.34)              |
| American Indian                | 1197                                                   | 0.7 (0.5 to 0.9)            | 217                                                                         | 0.07 (−0.20 to 0.35)             |

**SUPPLEMENTAL TABLE 6** VON Members Included in This Analysis

| Hospital Name                                               | City         | State      |
|-------------------------------------------------------------|--------------|------------|
| Brookwood Medical Center                                    | Birmingham   | Alabama    |
| St Vincent Birmingham                                       | Birmingham   | Alabama    |
| University of Alabama at Birmingham                         | Birmingham   | Alabama    |
| Huntsville Hospital                                         | Huntsville   | Alabama    |
| University of South Alabama Children's and Women's Hospital | Mobile       | Alabama    |
| Baptist Medical Center East                                 | Montgomery   | Alabama    |
| Baptist Medical Center South                                | Montgomery   | Alabama    |
| Children's Hospital at Providence                           | Anchorage    | Alaska     |
| Flagstaff Medical Center                                    | Flagstaff    | Arizona    |
| Abrazo Arrowhead Campus                                     | Glendale     | Arizona    |
| Banner Thunderbird Medical Center                           | Glendale     | Arizona    |
| Cardon Children's Medical Center                            | Mesa         | Arizona    |
| Arizona Children's Central Maricopa Integrated Health       | Phoenix      | Arizona    |
| Banner Estrella Medical Center                              | Phoenix      | Arizona    |
| Banner University Medical Center Phoenix                    | Phoenix      | Arizona    |
| Phoenix Children's Hospital                                 | Phoenix      | Arizona    |
| St Joseph's Hospital and Medical Center                     | Phoenix      | Arizona    |
| HonorHealth Scottsdale Shea Medical Center                  | Scottsdale   | Arizona    |
| Banner University Medical Center: Tucson                    | Tucson       | Arizona    |
| Washington Regional Medical Center                          | Fayetteville | Arkansas   |
| Mercy Hospital Fort Smith                                   | Fort Smith   | Arkansas   |
| Willow Creek Women's Hospital: NICU                         | Johnson      | Arkansas   |
| St Bernards Medical Center                                  | Jonesboro    | Arkansas   |
| Arkansas Children's Hospital                                | Little Rock  | Arkansas   |
| University of Arkansas for Medical Sciences                 | Little Rock  | Arkansas   |
| Mercy Hospital Northwest Arkansas                           | Rogers       | Arkansas   |
| Anaheim Regional Medical Center                             | Anaheim      | California |
| Kaiser Foundation Hospital Orange County: Anaheim           | Anaheim      | California |
| St Mary Medical Center                                      | Apple Valley | California |
| Methodist Hospital of Southern California                   | Arcadia      | California |
| Adventist Health Bakersfield                                | Bakersfield  | California |
| Bakersfield Memorial Hospital                               | Bakersfield  | California |
| Kern Medical Center                                         | Bakersfield  | California |
| Mercy Southwest Hospital                                    | Bakersfield  | California |
| Kaiser Foundation Hospital Baldwin Park                     | Baldwin Park | California |

**SUPPLEMENTAL TABLE 6** Continued

| Hospital Name                                                                  | City            | State      |
|--------------------------------------------------------------------------------|-----------------|------------|
| Alta Bates Summit Medical Center                                               | Berkeley        | California |
| Providence St Joseph Medical Center                                            | Burbank         | California |
| Mercy San Juan Medical Center                                                  | Carmichael      | California |
| Arrowhead Regional Medical Center                                              | Colton          | California |
| Kaiser Foundation Hospital Downey                                              | Downey          | California |
| Rady Children's at Scripps Encinitas Memorial Hosp                             | Encinitas       | California |
| Rady Children's at Palomar Medical Center Escondido                            | Escondido       | California |
| Northbay Medical Center                                                        | Fairfield       | California |
| Kaiser Foundation Hospital Fontana                                             | Fontana         | California |
| Fountain Valley Regional Hospital and Medical Center                           | Fountain Valley | California |
| Washington Hospital                                                            | Fremont         | California |
| San Joaquin General Hospital                                                   | French Camp     | California |
| Community Regional Medical Center                                              | Fresno          | California |
| Valley Children's Hospital at St Agnes Medical Center                          | Fresno          | California |
| St Jude Medical Center                                                         | Fullerton       | California |
| Adventist Health                                                               | Glendale        | California |
| Glendale Memorial Hospital and Health Center                                   | Glendale        | California |
| Centinela Hospital Medical Center                                              | Inglewood       | California |
| Kaiser Foundation Hospital Orange County: Irvine                               | Irvine          | California |
| Rady Children's at Scripps La Jolla                                            | La Jolla        | California |
| University of California, San Diego, Health La Jolla: Jacobs Medical Center    | La Jolla        | California |
| Grossmont Hospital, Women's Health Center                                      | La Mesa         | California |
| MemorialCare Saddleback Medical Center                                         | Laguna Hills    | California |
| Antelope Valley Hospital                                                       | Lancaster       | California |
| Loma Linda University Children's Hospital                                      | Loma Linda      | California |
| Miller Children's and Women's Hospital at Long Beach                           | Long Beach      | California |
| St Mary Medical Center                                                         | Long Beach      | California |
| California Hospital Medical Center                                             | Los Angeles     | California |
| Cedars-Sinai Medical Center                                                    | Los Angeles     | California |
| Children's Hospital Los Angeles                                                | Los Angeles     | California |
| Good Samaritan Hospital, Los Angeles                                           | Los Angeles     | California |
| Hollywood Presbyterian Medical Center                                          | Los Angeles     | California |
| Kaiser Foundation Hospital Los Angeles                                         | Los Angeles     | California |
| Kaiser Foundation Hospital West Los Angeles                                    | Los Angeles     | California |
| Los Angeles County and University of Southern California Medical Center        | Los Angeles     | California |
| University of California, Los Angeles, Mattel Children's Hospital              | Los Angeles     | California |
| Valley Children's Hospital                                                     | Madera          | California |
| Providence Holy Cross Medical Center                                           | Mission Hills   | California |
| Children's Hospital of California Children's at Mission Hospital               | Mission Viejo   | California |
| Doctors Medical Center of Modesto                                              | Modesto         | California |
| Kaiser Foundation Hospital Modesto                                             | Modesto         | California |
| Memorial Medical Center                                                        | Modesto         | California |
| Garfield Medical Center                                                        | Monterey Park   | California |
| Riverside University Health System Medical Center                              | Moreno Valley   | California |
| El Camino Hospital                                                             | Mountain View   | California |
| Rady Children's at Rancho Springs Medical Center                               | Murrieta        | California |
| Hoag Memorial Hospital, Presbyterian                                           | Newport Beach   | California |
| Northridge Hospital Medical Center                                             | Northridge      | California |
| Kaiser Foundation Hospital Oakland                                             | Oakland         | California |
| University of California, San Francisco, Benioff Children's Hospital - Oakland | Oakland         | California |
| Tri-City Medical Center                                                        | Oceanside       | California |
| Kaiser Foundation Hospital Ontario Campus                                      | Ontario         | California |
| Children's Hospital of California Children's Hospital                          | Orange          | California |
| University of California, Irvine, Medical Center                               | Orange          | California |
| St John's Regional Medical Center                                              | Oxnard          | California |
| Desert Regional Medical Center                                                 | Palm Springs    | California |
| Lucile Packard Children's Hospital Stanford                                    | Palo Alto       | California |
| Kaiser Foundation Hospital Panorama City                                       | Panorama City   | California |
| Huntington Memorial Hospital                                                   | Pasadena        | California |
| Pomona Valley Hospital Medical Center                                          | Pomona          | California |

**SUPPLEMENTAL TABLE 6** Continued

| Hospital Name                                                                                | City             | State      |
|----------------------------------------------------------------------------------------------|------------------|------------|
| Mercy Medical Center - Redding                                                               | Redding          | California |
| Redlands Community Hospital                                                                  | Redlands         | California |
| Lucile Packard Children's Hospital Special Care Nursery at Sequoia Hospital                  | Redwood City     | California |
| Advanced Healthcare Management Corporation Parkview Community Medical Center                 | Riverside        | California |
| Kaiser Foundation Hospital Riverside                                                         | Riverside        | California |
| Riverside Community Hospital                                                                 | Riverside        | California |
| Kaiser Foundation Hospital Roseville                                                         | Roseville        | California |
| Sutter Roseville Medical Center                                                              | Roseville        | California |
| Anderson Lucchetti Women's and Children's Center                                             | Sacramento       | California |
| Methodist Hospital of Sacramento                                                             | Sacramento       | California |
| University of California, Davis, Medical Center                                              | Sacramento       | California |
| Natividad Medical Center                                                                     | Salinas          | California |
| Salinas Valley Memorial Hospital                                                             | Salinas          | California |
| St Bernardine Medical Center                                                                 | San Bernardino   | California |
| Kaiser Foundation Hospital San Diego                                                         | San Diego        | California |
| Rady Children's Hospital San Diego                                                           | San Diego        | California |
| Sharp Mary Birch Hospital for Women and Newborns                                             | San Diego        | California |
| University of California, San Diego, Medical Center: Hillcrest                               | San Diego        | California |
| California Pacific Medical Center Van Ness Campus                                            | San Francisco    | California |
| Kaiser Foundation Hospital San Francisco                                                     | San Francisco    | California |
| University of California, San Francisco, Benioff Children's Hospital in San Francisco        | San Francisco    | California |
| Zuckerberg San Francisco General Hospital and Trauma Center                                  | San Francisco    | California |
| San Gabriel Valley Medical Center                                                            | San Gabriel      | California |
| Good Samaritan Hospital, San Jose                                                            | San Jose         | California |
| O'Connor Hospital: San Jose                                                                  | San Jose         | California |
| Santa Clara Valley Medical Center                                                            | San Jose         | California |
| Kaiser Foundation Hospital San Leandro                                                       | San Leandro      | California |
| Sierra Vista Regional Medical Center                                                         | San Luis Obispo  | California |
| Orange County Global Medical Center                                                          | Santa Ana        | California |
| Santa Barbara Cottage Hospital                                                               | Santa Barbara    | California |
| Kaiser Foundation Hospital Santa Clara                                                       | Santa Clara      | California |
| Dignity Health Dominican Hospital                                                            | Santa Cruz       | California |
| Marian Regional Medical Center                                                               | Santa Maria      | California |
| Providence St John's Health Center                                                           | Santa Monica     | California |
| Santa Monica, University of California, Los Angeles, Medical Center and Orthopaedic Hospital | Santa Monica     | California |
| Santa Rosa Memorial Hospital                                                                 | Santa Rosa       | California |
| Sutter Santa Rosa Regional Hospital                                                          | Santa Rosa       | California |
| Dameron Hospital Association                                                                 | Stockton         | California |
| St Joseph's Medical Center - Stockton                                                        | Stockton         | California |
| Los Angeles County Olive View: University of California, Los Angeles, Medical Center         | Sylmar           | California |
| Providence Cedars-Sinai Tarzana Medical Center                                               | Tarzana          | California |
| Los Robles Regional Hospital & Medical Center                                                | Thousand Oaks    | California |
| Los Angeles County Harbour: University of California, Los Angeles, Medical Center            | Torrance         | California |
| Providence Little Company of Mary Medical Center                                             | Torrance         | California |
| Torrance Memorial Medical Center                                                             | Torrance         | California |
| San Antonio Regional Hospital                                                                | Upland           | California |
| Henry Mayo Newhall Memorial Hospital                                                         | Valencia         | California |
| Valley Presbyterian Hospital                                                                 | Van Nuys         | California |
| Community Memorial Hospital of Ventura                                                       | Ventura          | California |
| Ventura County Medical Center                                                                | Ventura          | California |
| Kaweah Delta Healthcare District                                                             | Visalia          | California |
| John Muir Health, Walnut Creek Medical Center                                                | Walnut Creek     | California |
| Kaiser Foundation Hospital Walnut Creek                                                      | Walnut Creek     | California |
| Emanate Health: Queen of the Valley Hospital                                                 | West Covina      | California |
| Presbyterian Intercommunity Hospital                                                         | Whittier         | California |
| Kaiser Foundation Hospital Woodland Hills                                                    | Woodland Hills   | California |
| University of Colorado Health Sciences Center                                                | Aurora           | Colorado   |
| St Francis Medical Center                                                                    | Colorado Springs | Colorado   |
| Denver Health Medical Center                                                                 | Denver           | Colorado   |
| Rocky Mountain Hospital for Children at Presbyterian St. Luke's Medical Center               | Denver           | Colorado   |

**SUPPLEMENTAL TABLE 6** Continued

| Hospital Name                                                          | City              | State                |
|------------------------------------------------------------------------|-------------------|----------------------|
| Rose Medical Center                                                    | Denver            | Colorado             |
| Saint Joseph Hospital                                                  | Denver            | Colorado             |
| Swedish Medical Center                                                 | Englewood         | Colorado             |
| Poudre Valley Hospital                                                 | Fort Collins      | Colorado             |
| St Mary's Hospital and Medical Center                                  | Grand Junction    | Colorado             |
| Good Samaritan Medical Center                                          | Lafayette         | Colorado             |
| Sky Ridge Medical Center                                               | Lone Tree         | Colorado             |
| Yale-New Haven Children's at Bridgeport Hospital                       | Bridgeport        | Connecticut          |
| Danbury Hospital                                                       | Danbury           | Connecticut          |
| Connecticut Children's NICU at University of Connecticut Health Center | Farmington        | Connecticut          |
| Greenwich Hospital                                                     | Greenwich         | Connecticut          |
| Connecticut Children's Medical Center                                  | Hartford          | Connecticut          |
| St Francis Hospital                                                    | Hartford          | Connecticut          |
| Hospital of Central Connecticut                                        | New Britain       | Connecticut          |
| Yale-New Haven Children's Hospital                                     | New Haven         | Connecticut          |
| Norwalk Hospital                                                       | Norwalk           | Connecticut          |
| Stamford Hospital                                                      | Stamford          | Connecticut          |
| Christiana Care Health Services                                        | Newark            | Delaware             |
| MedStar Georgetown University Hospital                                 | Washington        | District of Columbia |
| Washington Hospital Center                                             | Washington        | District of Columbia |
| Brandon Regional Hospital                                              | Brandon           | Florida              |
| Halifax Medical Center                                                 | Daytona Beach     | Florida              |
| Broward Health Medical Center Salah Foundation Children's Hospital     | Fort Lauderdale   | Florida              |
| Golisano Children's Hospital of Southwest Florida                      | Fort Myers        | Florida              |
| Lawnwood Regional Medical Center and Heart Institute                   | Fort Pierce       | Florida              |
| North Florida Regional Medical Center, Inc                             | Gainesville       | Florida              |
| University of Florida Shands Hospital Gainesville                      | Gainesville       | Florida              |
| Joe DiMaggio Children's Hospital                                       | Hollywood         | Florida              |
| University of Florida Health Jacksonville                              | Jacksonville      | Florida              |
| Wolfson Children's Hospital                                            | Jacksonville      | Florida              |
| Northwest Medical Center                                               | Margate           | Florida              |
| Baptist Children's Hospital                                            | Miami             | Florida              |
| Jackson Memorial Hospital                                              | Miami             | Florida              |
| Kendall Regional Medical Center                                        | Miami             | Florida              |
| Nicklaus Children's Hospital                                           | Miami             | Florida              |
| Jackson North Medical Center                                           | North Miami Beach | Florida              |
| AdventHealth for Children                                              | Orlando           | Florida              |
| Nemours Children's Hospital                                            | Orlando           | Florida              |
| Winnie Palmer Hospital for Women and Babies                            | Orlando           | Florida              |
| Gulf Coast Regional Medical Center                                     | Panama City       | Florida              |
| Sacred Heart Health System                                             | Pensacola         | Florida              |
| Plantation General Hospital                                            | Plantation        | Florida              |
| Johns Hopkins All Children's Hospital                                  | Saint Petersburg  | Florida              |
| All Children's at Sarasota Memorial                                    | Sarasota          | Florida              |
| Tallahassee Memorial Hospital                                          | Tallahassee       | Florida              |
| St Joseph's Children's Hospital                                        | Tampa             | Florida              |
| Tampa General Hospital                                                 | Tampa             | Florida              |
| Women's Center: Advent Health Tampa                                    | Tampa             | Florida              |
| Wellington Regional Medical Center                                     | Wellington        | Florida              |
| St Mary's Hospital                                                     | West Palm Beach   | Florida              |
| Phoebe Putney Memorial Hospital                                        | Albany            | Georgia              |
| Piedmont Athens Regional                                               | Athens            | Georgia              |
| Emory University Hospital, Midtown                                     | Atlanta           | Georgia              |
| Grady Memorial Hospital                                                | Atlanta           | Georgia              |
| Northside Hospital                                                     | Atlanta           | Georgia              |
| Piedmont Hospital                                                      | Atlanta           | Georgia              |
| Augusta University Health System                                       | Augusta           | Georgia              |
| Wellstar Cobb Hospital                                                 | Austell           | Georgia              |
| Medical Center at Columbus Regional                                    | Columbus          | Georgia              |
| Piedmont Rockdale Hospital                                             | Conyers           | Georgia              |

**SUPPLEMENTAL TABLE 6** Continued

| Hospital Name                                                                    | City            | State    |
|----------------------------------------------------------------------------------|-----------------|----------|
| Northside Hospital Forsyth                                                       | Cumming         | Georgia  |
| Hamilton Medical Center                                                          | Dalton          | Georgia  |
| Piedmont Fayette Hospital                                                        | Fayetteville    | Georgia  |
| Northeast Georgia Medical Center                                                 | Gainesville     | Georgia  |
| Gwinnett Hospital System                                                         | Lawrenceville   | Georgia  |
| Coliseum Medical Center                                                          | Macon           | Georgia  |
| Wellstar Kennestone Hospital                                                     | Marietta        | Georgia  |
| Southern Regional Medical Center                                                 | Riverdale       | Georgia  |
| Floyd Medical Center                                                             | Rome            | Georgia  |
| Memorial Health Savannah                                                         | Savannah        | Georgia  |
| St Joseph's/Candler Health System                                                | Savannah        | Georgia  |
| Eastside Medical Center                                                          | Snellville      | Georgia  |
| Piedmont Henry Hospital                                                          | Stockbridge     | Georgia  |
| Kaiser Permanente Moanalua Medical Center                                        | Honolulu        | Hawaii   |
| Kapiolani Medical Center for Women and Children                                  | Honolulu        | Hawaii   |
| St Luke's Regional Medical Center                                                | Boise           | Idaho    |
| Eastern Idaho Regional Medical Center                                            | Idaho Falls     | Idaho    |
| St Luke's Meridian Medical Center                                                | Meridian        | Idaho    |
| St Luke's Magic Valley                                                           | Twin Falls      | Idaho    |
| Rush Copley Medical Center                                                       | Aurora          | Illinois |
| Memorial Hospital of Carbondale                                                  | Carbondale      | Illinois |
| Advocate Illinois Masonic Medical Center                                         | Chicago         | Illinois |
| John H. Stroger, Jr, Hospital of Cook County                                     | Chicago         | Illinois |
| Mt. Sinai Hospital Medical Center                                                | Chicago         | Illinois |
| Northwestern Memorial                                                            | Chicago         | Illinois |
| Rush University Medical Center                                                   | Chicago         | Illinois |
| St Joseph Hospital Chicago                                                       | Chicago         | Illinois |
| University of Chicago                                                            | Chicago         | Illinois |
| University of Illinois at Chicago                                                | Chicago         | Illinois |
| Advocate Good Samaritan Hospital                                                 | Downers Grove   | Illinois |
| Evanston Hospital                                                                | Evanston        | Illinois |
| Adventist Hinsdale Hospital                                                      | Hinsdale        | Illinois |
| St Alexius Medical Center                                                        | Hoffman Estates | Illinois |
| Amita Health St Joseph Medical Center                                            | Joliet          | Illinois |
| Ronald McDonald Children's Hospital at Loyola University Medical Center          | Maywood         | Illinois |
| Edward Hospital and Health Services                                              | Naperville      | Illinois |
| Advocate Children's Hospital-Oak Lawn                                            | Oak Lawn        | Illinois |
| Advocate Children's Hospital - Park Ridge                                        | Park Ridge      | Illinois |
| Children's Hospital of Illinois at Order of St Francis St Francis Medical Center | Peoria          | Illinois |
| Javon Bea Hospital: Riverside                                                    | Rockford        | Illinois |
| St John's Hospital                                                               | Springfield     | Illinois |
| Carle Foundation Hospital                                                        | Urbana          | Illinois |
| Central DuPage Hospital                                                          | Winfield        | Illinois |
| Ascension St Vincent Carmel                                                      | Carmel          | Indiana  |
| Indiana University Health North Hospital                                         | Carmel          | Indiana  |
| Franciscan Health Crown Point                                                    | Crown Point     | Indiana  |
| Ascension St Vincent Evansville                                                  | Evansville      | Indiana  |
| Dupont Hospital                                                                  | Fort Wayne      | Indiana  |
| Lutheran Hospital of Indiana                                                     | Fort Wayne      | Indiana  |
| Parkview Women's and Children's Hospital                                         | Fort Wayne      | Indiana  |
| St Joseph Hospital                                                               | Fort Wayne      | Indiana  |
| Ascension St Vincent Hospital: Women's                                           | Indianapolis    | Indiana  |
| Community Hospital North Indianapolis                                            | Indianapolis    | Indiana  |
| Franciscan St Francis Health                                                     | Indianapolis    | Indiana  |
| Riley Hospital for Children at Indiana University Health                         | Indianapolis    | Indiana  |
| Franciscan Health Lafayette                                                      | Lafayette       | Indiana  |
| Saint Joseph Regional Medical Center                                             | Mishawaka       | Indiana  |
| Ball Memorial Hospital                                                           | Muncie          | Indiana  |
| Community Hospital                                                               | Munster         | Indiana  |
| Women's Hospital                                                                 | Newburgh        | Indiana  |



**SUPPLEMENTAL TABLE 6** Continued

| Hospital Name                                                       | City            | State     |
|---------------------------------------------------------------------|-----------------|-----------|
| Memorial Hospital                                                   | South Bend      | Indiana   |
| Union Hospital                                                      | Terre Haute     | Indiana   |
| St Luke's Hospital                                                  | Cedar Rapids    | Iowa      |
| Genesis Medical Center                                              | Davenport       | Iowa      |
| Blank Children's Hospital                                           | Des Moines      | Iowa      |
| Mercy Medical Center                                                | Des Moines      | Iowa      |
| University of Iowa Children's Hospital                              | Iowa City       | Iowa      |
| St Luke's Regional Medical Center                                   | Sioux City      | Iowa      |
| University of Kansas Hospital Authority                             | Kansas City     | Kansas    |
| Overland Park Regional Medical Center                               | Overland Park   | Kansas    |
| Shawnee Mission Medical Center                                      | Shawnee Mission | Kansas    |
| Ascension Via Christi Hospital                                      | Wichita         | Kansas    |
| Wesley Medical Center                                               | Wichita         | Kansas    |
| Medical Center NICU Bowling Green                                   | Bowling Green   | Kentucky  |
| St Elizabeth Healthcare                                             | Edgewood        | Kentucky  |
| Hardin Memorial Hospital                                            | Elizabethtown   | Kentucky  |
| Frankfort Regional Medical Center                                   | Frankfort       | Kentucky  |
| Methodist Hospital                                                  | Henderson       | Kentucky  |
| Jennie Stuart Medical Center                                        | Hopkinsville    | Kentucky  |
| Baptist Health Lexington                                            | Lexington       | Kentucky  |
| Kentucky Children's Hospital                                        | Lexington       | Kentucky  |
| Women's Hospital at St Joseph East                                  | Lexington       | Kentucky  |
| Baptist Health Louisville                                           | Louisville      | Kentucky  |
| Norton Children's Hospital                                          | Louisville      | Kentucky  |
| Norton Women's and Children's Hospital                              | Louisville      | Kentucky  |
| University of Louisville Hospital                                   | Louisville      | Kentucky  |
| Baptist Health Madisonville                                         | Madisonville    | Kentucky  |
| Owensboro Health Regional Hospital                                  | Owensboro       | Kentucky  |
| Baptist Health Paducah                                              | Paducah         | Kentucky  |
| Christus St Frances Cabrini Hospital                                | Alexandria      | Louisiana |
| Rapides Women's and Children's Hospital                             | Alexandria      | Louisiana |
| Baton Rouge General Medical Center: Bluebonnet                      | Baton Rouge     | Louisiana |
| Ochsner Medical Center Baton Rouge                                  | Baton Rouge     | Louisiana |
| Woman's Hospital                                                    | Baton Rouge     | Louisiana |
| Lakeview Regional Medical Center                                    | Covington       | Louisiana |
| St Tammany Parish Hospital                                          | Covington       | Louisiana |
| Ochsner Medical Center WestBank                                     | Gretna          | Louisiana |
| North Oaks Medical Center                                           | Hammond         | Louisiana |
| Terrebonne General Medical Center                                   | Houma           | Louisiana |
| Lafayette General Medical Center                                    | Lafayette       | Louisiana |
| Our Lady of Lourdes Women's and Children's Hospital                 | Lafayette       | Louisiana |
| Christus Lake Area Hospital                                         | Lake Charles    | Louisiana |
| Lake Charles Memorial Hospital for Women                            | Lake Charles    | Louisiana |
| West Jefferson Medical Center                                       | Marrero         | Louisiana |
| East Jefferson General Hospital                                     | Metairie        | Louisiana |
| Tulane Lakeside Hospital                                            | Metairie        | Louisiana |
| St Francis Medical Center                                           | Monroe          | Louisiana |
| Children's Hospital of New Orleans                                  | New Orleans     | Louisiana |
| Ochsner Baptist Medical Center                                      | New Orleans     | Louisiana |
| Touro Infirmary                                                     | New Orleans     | Louisiana |
| Christus Highland                                                   | Shreveport      | Louisiana |
| Ochsner Health Shreveport: Academic Medical Center                  | Shreveport      | Louisiana |
| Willis Knighton South                                               | Shreveport      | Louisiana |
| Slidell Memorial Hospital                                           | Slidell         | Louisiana |
| Eastern Maine Medical Center                                        | Bangor          | Maine     |
| Barbara Bush Children's at Maine Medical                            | Portland        | Maine     |
| Anne Arundel Medical Center                                         | Annapolis       | Maryland  |
| Franklin Square Hospital Center                                     | Baltimore       | Maryland  |
| Greater Baltimore Medical Center                                    | Baltimore       | Maryland  |
| Johns Hopkins Bayview Medical Center Hopkins Bayview Medical Center | Baltimore       | Maryland  |

**SUPPLEMENTAL TABLE 6** Continued

| Hospital Name                                                       | City           | State         |
|---------------------------------------------------------------------|----------------|---------------|
| Johns Hopkins Hospital                                              | Baltimore      | Maryland      |
| Mercy Medical Center: Baltimore                                     | Baltimore      | Maryland      |
| Sinai Hospital of Baltimore                                         | Baltimore      | Maryland      |
| St Agnes Hospital                                                   | Baltimore      | Maryland      |
| Univ of Maryland Medical Center                                     | Baltimore      | Maryland      |
| Walter Reed National Military Medical Center NICU                   | Bethesda       | Maryland      |
| Prince George's Hospital Center                                     | Cheverly       | Maryland      |
| Howard County General Hospital                                      | Columbia       | Maryland      |
| Frederick Memorial Hospital                                         | Frederick      | Maryland      |
| Shady Grove Adventist Hospital                                      | Rockville      | Maryland      |
| Holy Cross Hospital                                                 | Silver Spring  | Maryland      |
| University of Maryland St Joseph Medical Center                     | Towson         | Maryland      |
| Beth Israel Deaconess Medical Center                                | Boston         | Massachusetts |
| Boston Medical Center                                               | Boston         | Massachusetts |
| Brigham and Women's Hospital                                        | Boston         | Massachusetts |
| Massachusetts General Hospital for Children                         | Boston         | Massachusetts |
| Tufts Medical Center                                                | Boston         | Massachusetts |
| Steward St Elizabeth's Medical Center                               | Brighton       | Massachusetts |
| South Shore Hospital                                                | South Weymouth | Massachusetts |
| Baystate Medical Center                                             | Springfield    | Massachusetts |
| UMass Memorial Healthcare                                           | Worcester      | Massachusetts |
| St Joseph Mercy Hospital                                            | Ann Arbor      | Michigan      |
| University of Michigan, C.S. Mott Children's Hospital, Brandon NICU | Ann Arbor      | Michigan      |
| Beaumont Hospital: Dearborn                                         | Dearborn       | Michigan      |
| Ascension St John Hospital                                          | Detroit        | Michigan      |
| Children's Hospital of Michigan                                     | Detroit        | Michigan      |
| Henry Ford Hospital                                                 | Detroit        | Michigan      |
| Hutzel Women's Hospital                                             | Detroit        | Michigan      |
| Hurley Medical Center                                               | Flint          | Michigan      |
| Helen DeVos Children's Hospital                                     | Grand Rapids   | Michigan      |
| Mercy Health Saint Mary's                                           | Grand Rapids   | Michigan      |
| Children's Hospital at Bronson                                      | Kalamazoo      | Michigan      |
| Sparrow Hospital                                                    | Lansing        | Michigan      |
| UPHS-Marquette                                                      | Marquette      | Michigan      |
| St Joseph Mercy Oakland                                             | Pontiac        | Michigan      |
| William Beaumont Hospital                                           | Royal Oak      | Michigan      |
| Covenant Healthcare                                                 | Saginaw        | Michigan      |
| Ascension Providence Hospital Southfield Campus                     | Southfield     | Michigan      |
| Munson Medical Center                                               | Traverse City  | Michigan      |
| Essentia Health: St Mary's Children's Hospital                      | Duluth         | Minnesota     |
| Children's Minnesota                                                | Minneapolis    | Minnesota     |
| Hennepin County Medical Center                                      | Minneapolis    | Minnesota     |
| University of Minnesota Masonic Children's Hospital                 | Minneapolis    | Minnesota     |
| North Memorial Medical Center                                       | Robbinsdale    | Minnesota     |
| Mayo Foundation                                                     | Rochester      | Minnesota     |
| St Cloud Hospital                                                   | Saint Cloud    | Minnesota     |
| Children's Minnesota: St Paul                                       | Saint Paul     | Minnesota     |
| Merit Health River Oaks                                             | Flowood        | Mississippi   |
| Merit Health Woman's Hospital                                       | Flowood        | Mississippi   |
| Delta Regional Medical Center                                       | Greenville     | Mississippi   |
| Memorial Hospital at Gulfport                                       | Gulfport       | Mississippi   |
| Forrest General Hospital                                            | Hattiesburg    | Mississippi   |
| Merit Health Wesley                                                 | Hattiesburg    | Mississippi   |
| Children's Hospital at University of Mississippi Health Care        | Jackson        | Mississippi   |
| Mississippi Baptist Health Systems                                  | Jackson        | Mississippi   |
| St Dominic, Jackson Memorial Hospital                               | Jackson        | Mississippi   |
| Anderson Regional Medical Center                                    | Meridian       | Mississippi   |
| North Mississippi Medical Center                                    | Tupelo         | Mississippi   |
| St Francis Medical Center                                           | Cape Girardeau | Missouri      |
| Women's and Children's Hospital, University of Missouri             | Columbia       | Missouri      |

**SUPPLEMENTAL TABLE 6** Continued

| Hospital Name                                                          | City          | State         |
|------------------------------------------------------------------------|---------------|---------------|
| Centerpoint Medical Center                                             | Independence  | Missouri      |
| Freeman Hospital and Health System                                     | Joplin        | Missouri      |
| Mercy Hospital Joplin                                                  | Joplin        | Missouri      |
| Children's Mercy Kansas City                                           | Kansas City   | Missouri      |
| Research Medical Center                                                | Kansas City   | Missouri      |
| St Luke's Hospital                                                     | Kansas City   | Missouri      |
| Truman Medical Center                                                  | Kansas City   | Missouri      |
| Mercy Children's Hospital: St Louis                                    | Saint Louis   | Missouri      |
| SSM Health Cardinal Glennon Children's Hospital                        | Saint Louis   | Missouri      |
| St Louis Children's Hospital                                           | Saint Louis   | Missouri      |
| Cox Health Neonatology                                                 | Springfield   | Missouri      |
| Mercy Kids Springfield                                                 | Springfield   | Missouri      |
| Billings Clinic                                                        | Billings      | Montana       |
| St Vincent Hospital and Health Center                                  | Billings      | Montana       |
| Benefis Healthcare                                                     | Great Falls   | Montana       |
| Kalispell Regional Medical Center                                      | Kalispell     | Montana       |
| Community Medical Center                                               | Missoula      | Montana       |
| Bryan Medical Center                                                   | Lincoln       | Nebraska      |
| Catholic Health Initiatives Health St Elizabeth                        | Lincoln       | Nebraska      |
| Catholic Health Initiatives Health Bergan Mercy Medical Center         | Omaha         | Nebraska      |
| Creighton University Medical Center                                    | Omaha         | Nebraska      |
| Methodist Women's Hospital                                             | Omaha         | Nebraska      |
| Nebraska Medical Center                                                | Omaha         | Nebraska      |
| St Rose Dominican Hospital Siena Campus                                | Henderson     | Nevada        |
| Children's Hospital of Nevada at University Medical Center             | Las Vegas     | Nevada        |
| Sunrise Hospital and Medical Center                                    | Las Vegas     | Nevada        |
| Dartmouth Hitchcock Medical Center                                     | Lebanon       | New Hampshire |
| Elliot Hospital                                                        | Manchester    | New Hampshire |
| Children's at Cooper University Medical Center                         | Camden        | New Jersey    |
| Our Lady of Lourdes Medical Center                                     | Camden        | New Jersey    |
| Hackensack University Medical Center                                   | Hackensack    | New Jersey    |
| Jersey City Medical Center                                             | Jersey City   | New Jersey    |
| Saint Barnabas Medical Center                                          | Livingston    | New Jersey    |
| Monmouth Medical Center                                                | Long Branch   | New Jersey    |
| Goryeb Children's Hospital                                             | Morristown    | New Jersey    |
| Jersey Shore University Medical Center                                 | Neptune       | New Jersey    |
| Robert Wood Johnson University Hospital                                | New Brunswick | New Jersey    |
| St Peter's Medical Center                                              | New Brunswick | New Jersey    |
| Children's Hospital of New Jersey at Newark Beth Israel Medical Center | Newark        | New Jersey    |
| University Hospital: Rutgers New Jersey Medical School                 | Newark        | New Jersey    |
| St Joseph Hospital and Medical Center                                  | Paterson      | New Jersey    |
| Capital Health Medical Center: Hopewell                                | Pennington    | New Jersey    |
| Atlanticare Regional Medical Center: NICU                              | Pomona        | New Jersey    |
| Overlook Medical Center                                                | Summit        | New Jersey    |
| Inspira Health Network                                                 | Vineland      | New Jersey    |
| Virtua Hospital Systems                                                | Voorhees      | New Jersey    |
| Children's Medical Center at Presbyterian Hospital                     | Albuquerque   | New Mexico    |
| Lovelace Women's Hospital                                              | Albuquerque   | New Mexico    |
| University of New Mexico Health Sciences Center                        | Albuquerque   | New Mexico    |
| Albany Medical Center                                                  | Albany        | New York      |
| St Peter's Hospital                                                    | Albany        | New York      |
| Jacobi Medical Center                                                  | Bronx         | New York      |
| Montefiore Medical Center: Wakefield Division                          | Bronx         | New York      |
| Weiler Hospital Montefiore                                             | Bronx         | New York      |
| Brookdale Hospital Medical Center                                      | Brooklyn      | New York      |
| Brooklyn Hospital Center                                               | Brooklyn      | New York      |
| Maimonides Medical Center                                              | Brooklyn      | New York      |
| University Hospital of Brooklyn                                        | Brooklyn      | New York      |
| Sisters of Charity Hospital                                            | Buffalo       | New York      |
| Arnot Ogden Medical Center                                             | Elmira        | New York      |

**SUPPLEMENTAL TABLE 6** Continued

| Hospital Name                                                                       | City          | State          |
|-------------------------------------------------------------------------------------|---------------|----------------|
| North Shore University Hospital                                                     | Manhasset     | New York       |
| New York University Winthrop                                                        | Mineola       | New York       |
| Northern Westchester Hospital                                                       | Mount Kisco   | New York       |
| Cohen Children's Medical Center of New York                                         | New Hyde Park | New York       |
| Bellevue Hospital                                                                   | New York      | New York       |
| Columbia University Medical Center                                                  | New York      | New York       |
| Lenox Hill Hospital                                                                 | New York      | New York       |
| Mt. Sinai Kravis Children's Hospital                                                | New York      | New York       |
| Tisch Hospital, New York University Medical Center                                  | New York      | New York       |
| Weill Cornell Medical Center                                                        | New York      | New York       |
| Vassar Brothers Hospital                                                            | Poughkeepsie  | New York       |
| Golisano Children's Hospital at Strong                                              | Rochester     | New York       |
| Richmond University Medical Center                                                  | Staten Island | New York       |
| Staten Island University Hospital                                                   | Staten Island | New York       |
| Stony Brook University Medical Center                                               | Stony Brook   | New York       |
| St Joseph's Health Center                                                           | Syracuse      | New York       |
| Good Samaritan Hospital Medical Center                                              | West Islip    | New York       |
| Mission Children's Hospital                                                         | Asheville     | North Carolina |
| North Carolina Children's Hospital                                                  | Chapel Hill   | North Carolina |
| Carolinas Medical Center                                                            | Charlotte     | North Carolina |
| Novant Health Presbyterian Medical Center                                           | Charlotte     | North Carolina |
| Jeff Gordon Children's Hospital at Carolinas Medical Center                         | Concord       | North Carolina |
| Duke University                                                                     | Durham        | North Carolina |
| Cape Fear Valley Medical Center                                                     | Fayetteville  | North Carolina |
| CaroMont Regional Medical Center                                                    | Gastonia      | North Carolina |
| Cone Health Women's Hospital                                                        | Greensboro    | North Carolina |
| Vidant Medical Center                                                               | Greenville    | North Carolina |
| Catawba Valley Medical Center                                                       | Hickory       | North Carolina |
| Onslow Memorial Hospital                                                            | Jacksonville  | North Carolina |
| FirstHealth Moore Regional Hospital                                                 | Pinehurst     | North Carolina |
| Rex Hospital                                                                        | Raleigh       | North Carolina |
| WakeMedical Center                                                                  | Raleigh       | North Carolina |
| New Hanover Regional Medical Center: Betty H. Cameron Women and Children's Hospital | Wilmington    | North Carolina |
| Brenner Children's Hospital at Wake Forest Baptist Medical Center                   | Winston-Salem | North Carolina |
| Forsyth Memorial Hospital                                                           | Winston-Salem | North Carolina |
| Sanford Bismarck Medical Center                                                     | Bismarck      | North Dakota   |
| Essentia Health                                                                     | Fargo         | North Dakota   |
| Sanford Medical Center Fargo                                                        | Fargo         | North Dakota   |
| Altru Health System                                                                 | Grand Forks   | North Dakota   |
| Trinity Hospital                                                                    | Minot         | North Dakota   |
| Akron Children's Hospital                                                           | Akron         | Ohio           |
| Akron Children's Special Care Nursery at Summa                                      | Akron         | Ohio           |
| Akron Children's NICU at St Elizabeth :Boardman                                     | Boardman      | Ohio           |
| Akron Children's NICU at Aultman                                                    | Canton        | Ohio           |
| Children's Hospital Medical Center Cincinnati                                       | Cincinnati    | Ohio           |
| Good Samaritan Hospital                                                             | Cincinnati    | Ohio           |
| University Hospital, Cincinnati                                                     | Cincinnati    | Ohio           |
| Cleveland Clinic Foundation                                                         | Cleveland     | Ohio           |
| Fairview Hospital                                                                   | Cleveland     | Ohio           |
| MetroHealth Medical Center                                                          | Cleveland     | Ohio           |
| Rainbow Babies and Children's Hospital                                              | Cleveland     | Ohio           |
| Mount Carmel East                                                                   | Columbus      | Ohio           |
| Nationwide Children's Hospital at Doctor's Hospital West                            | Columbus      | Ohio           |
| Nationwide Children's Hospital at Grant Medical Center                              | Columbus      | Ohio           |
| Nationwide Children's Hospital at Riverside Methodist Hospital                      | Columbus      | Ohio           |
| Nationwide Children's Hospital Main Campus                                          | Columbus      | Ohio           |
| Nationwide Children's Hospital NICU at Ohio State Medical Center                    | Columbus      | Ohio           |
| Dayton Children's Hospital                                                          | Dayton        | Ohio           |
| Miami Valley Hospital                                                               | Dayton        | Ohio           |
| Nationwide Children's Hospital at Dublin Methodist Hospital                         | Dublin        | Ohio           |

**SUPPLEMENTAL TABLE 6** Continued

| Hospital Name                                                               | City             | State          |
|-----------------------------------------------------------------------------|------------------|----------------|
| Mount Carmel Grove City                                                     | Grove City       | Ohio           |
| Kettering Medical Center                                                    | Kettering        | Ohio           |
| Cleveland Clinic Children's - Hillcrest NICU                                | Mayfield Heights | Ohio           |
| Mercy Children's Hospital                                                   | Toledo           | Ohio           |
| Russell J. Ebeid Children's Hospital                                        | Toledo           | Ohio           |
| Nationwide Children's Hospital NICU at Mount Carmel St Ann's Hospital       | Westerville      | Ohio           |
| Mercy Hospital Oklahoma City                                                | Oklahoma City    | Oklahoma       |
| Oklahoma University Health Sciences Center                                  | Oklahoma City    | Oklahoma       |
| Henry Zarrow NICU                                                           | Tulsa            | Oklahoma       |
| Oklahoma Stat University Medical Center                                     | Tulsa            | Oklahoma       |
| Peggy V. Helmerich Women's Center                                           | Tulsa            | Oklahoma       |
| St John Medical Center                                                      | Tulsa            | Oklahoma       |
| St Charles Health Care                                                      | Bend             | Oregon         |
| Kaiser Sunnyside Medical Center                                             | Clackamas        | Oregon         |
| Rogue Regional Medical Center                                               | Medford          | Oregon         |
| Oregon Health and Science University                                        | Portland         | Oregon         |
| Providence Portland Medical Center                                          | Portland         | Oregon         |
| Providence St Vincent Medical Center                                        | Portland         | Oregon         |
| Randall Children's Hospital at Legacy Emanuel                               | Portland         | Oregon         |
| Salem Hospital                                                              | Salem            | Oregon         |
| Sacred Heart Medical Center                                                 | Springfield      | Oregon         |
| Abington Memorial Hospital                                                  | Abington         | Pennsylvania   |
| Lehigh Valley Health Network                                                | Allentown        | Pennsylvania   |
| St Luke's University Hospital                                               | Bethlehem        | Pennsylvania   |
| Bryn Mawr Hospital                                                          | Bryn Mawr        | Pennsylvania   |
| Holy Spirit Hospital                                                        | Camp Hill        | Pennsylvania   |
| Geisinger Medical Center                                                    | Danville         | Pennsylvania   |
| Penn Highlands DuBois                                                       | DuBois           | Pennsylvania   |
| Einstein Medical Center Montgomery                                          | East Norriton    | Pennsylvania   |
| Hamot Medical Center                                                        | Erie             | Pennsylvania   |
| St Vincent Health Center                                                    | Erie             | Pennsylvania   |
| Pinnacle Health Hospitals                                                   | Harrisburg       | Pennsylvania   |
| Penn State Children's Hospital                                              | Hershey          | Pennsylvania   |
| Conemaugh Memorial Medical Center                                           | Johnstown        | Pennsylvania   |
| Lancaster General Health: Women and Babies Hospital                         | Lancaster        | Pennsylvania   |
| Holy Redeemer Hospital and Medical Center                                   | Meadowbrook      | Pennsylvania   |
| Riddle Hospital                                                             | Media            | Pennsylvania   |
| Children's Hospital of Philadelphia Newborn Center                          | Philadelphia     | Pennsylvania   |
| Einstein Medical Center Philadelphia                                        | Philadelphia     | Pennsylvania   |
| Hahnemann University Hospital                                               | Philadelphia     | Pennsylvania   |
| Hospital of the University of Pennsylvania                                  | Philadelphia     | Pennsylvania   |
| Pennsylvania Hospital                                                       | Philadelphia     | Pennsylvania   |
| Temple University Hospital                                                  | Philadelphia     | Pennsylvania   |
| Thomas Jefferson University Hospital                                        | Philadelphia     | Pennsylvania   |
| Magee-Womens Hospital of University of Pittsburgh Medical Center            | Pittsburgh       | Pennsylvania   |
| Western Pennsylvania Hospital                                               | Pittsburgh       | Pennsylvania   |
| Reading Hospital-Tower Health                                               | Reading          | Pennsylvania   |
| Moses Taylor Hospital                                                       | Scranton         | Pennsylvania   |
| Crozer Chester Medical Center                                               | Upland           | Pennsylvania   |
| Children's Hospital of Philadelphia Newborn Care at Chester County Hospital | West Chester     | Pennsylvania   |
| Geisinger Wyoming Valley Medical Center                                     | Wilkes-Barre     | Pennsylvania   |
| Lankenau Medical Center                                                     | Wynnewood        | Pennsylvania   |
| WellSpan York Hospital                                                      | York             | Pennsylvania   |
| Women and Infants Hospital                                                  | Providence       | Rhode Island   |
| Medical University of South Carolina                                        | Charleston       | South Carolina |
| Trident Medical Center                                                      | Charleston       | South Carolina |
| Palmetto Health Baptist, Women's and Neonatal Services                      | Columbia         | South Carolina |
| Palmetto Health Richland                                                    | Columbia         | South Carolina |
| McLeod Regional Medical Center                                              | Florence         | South Carolina |
| Children's Hospital of Greenville                                           | Greenville       | South Carolina |

**SUPPLEMENTAL TABLE 6** Continued

| Hospital Name                                                        | City           | State          |
|----------------------------------------------------------------------|----------------|----------------|
| Piedmont Medical Center                                              | Rock Hill      | South Carolina |
| Spartanburg Regional Healthcare System                               | Spartanburg    | South Carolina |
| Summerville Medical Center                                           | Summerville    | South Carolina |
| Rapid City Regional Hospital                                         | Rapid City     | South Dakota   |
| Avera McKennan                                                       | Sioux Falls    | South Dakota   |
| Boekelheide NICU at Sanford Health                                   | Sioux Falls    | South Dakota   |
| Children's Hospital at Erlanger                                      | Chattanooga    | Tennessee      |
| Parkridge East Hospital                                              | Chattanooga    | Tennessee      |
| TriStar Summit Medical Center                                        | Hermitage      | Tennessee      |
| Jackson Madison County General Hospital                              | Jackson        | Tennessee      |
| Niswonger Children's Hospital                                        | Johnson City   | Tennessee      |
| East Tennessee Children's Hospital                                   | Knoxville      | Tennessee      |
| University of Tennessee Medical Center                               | Knoxville      | Tennessee      |
| Baptist Memorial Hospital for Women                                  | Memphis        | Tennessee      |
| Regional One Health                                                  | Memphis        | Tennessee      |
| Children's Hospital at TriStar Centennial                            | Nashville      | Tennessee      |
| Monroe Carell Jr Children's Hospital Vanderbilt                      | Nashville      | Tennessee      |
| Abilene Regional Medical Center                                      | Abilene        | Texas          |
| Hendrick Medical Center                                              | Abilene        | Texas          |
| Baptist St Anthony's Health System                                   | Amarillo       | Texas          |
| Texas Tech University Health Science Center                          | Amarillo       | Texas          |
| Medical City Arlington                                               | Arlington      | Texas          |
| Texas Health Arlington Memorial Hospital                             | Arlington      | Texas          |
| Dell Children's Medical Center of Central Texas                      | Austin         | Texas          |
| North Austin Medical Center                                          | Austin         | Texas          |
| Seton Medical Center                                                 | Austin         | Texas          |
| St David's Medical Center                                            | Austin         | Texas          |
| Christus Southeast Texas Hospital                                    | Beaumont       | Texas          |
| Hospital Corporation of America Houston Healthcare Conroe            | Conroe         | Texas          |
| Christus Spohn Hospital Corpus Christi South                         | Corpus Christi | Texas          |
| Corpus Christi Medical Center                                        | Corpus Christi | Texas          |
| Driscoll Children's Hospital                                         | Corpus Christi | Texas          |
| Baylor Healthcare System                                             | Dallas         | Texas          |
| Medical City Dallas                                                  | Dallas         | Texas          |
| Methodist Dallas Medical Center                                      | Dallas         | Texas          |
| Presbyterian Hospital of Dallas                                      | Dallas         | Texas          |
| Texas Health Presbyterian Hospital Dallas                            | Dallas         | Texas          |
| University of Texas Southwestern Medical Center Dallas               | Dallas         | Texas          |
| William P. Clements Jr University Hospital                           | Dallas         | Texas          |
| Women's Hospital At Renaissance                                      | Edinburg       | Texas          |
| Del Sol Medical Center                                               | El Paso        | Texas          |
| El Paso Children's Hospital                                          | El Paso        | Texas          |
| Las Palmas Medical Center                                            | El Paso        | Texas          |
| Texas Health Presbyterian Hospital Flower Mound                      | Flower Mound   | Texas          |
| Baylor All Saints Medical Center                                     | Fort Worth     | Texas          |
| Cook Children's Medical Center                                       | Fort Worth     | Texas          |
| Harris Methodist Fort Worth Hospital                                 | Fort Worth     | Texas          |
| John Peter Smith Hospital                                            | Fort Worth     | Texas          |
| Medical City Alliance                                                | Fort Worth     | Texas          |
| University of Texas Medical Branch                                   | Galveston      | Texas          |
| Valley Baptist Medical Center: Harlingen                             | Harlingen      | Texas          |
| Ben Taub General Hospital                                            | Houston        | Texas          |
| Children's Memorial Hermann Hospital                                 | Houston        | Texas          |
| Hospital Corporation of America Houston Healthcare Cypress Fairbanks | Houston        | Texas          |
| Houston Methodist West Hospital                                      | Houston        | Texas          |
| Lyndon B. Johnson General Hospital                                   | Houston        | Texas          |
| Memorial Hermann Memorial City Medical Center                        | Houston        | Texas          |
| Memorial Hermann Southeast                                           | Houston        | Texas          |
| Memorial Hermann Southwest                                           | Houston        | Texas          |
| Methodist Willowbrook Hospital                                       | Houston        | Texas          |

**SUPPLEMENTAL TABLE 6** Continued

| Hospital Name                                                       | City            | State    |
|---------------------------------------------------------------------|-----------------|----------|
| St Joseph Hospital                                                  | Houston         | Texas    |
| Texas Children's Hospital, Baylor College of Medicine               | Houston         | Texas    |
| Woman's Hospital of Texas                                           | Houston         | Texas    |
| Memorial Hermann Northeast Hospital                                 | Humble          | Texas    |
| Memorial Hermann Katy Hospital                                      | Katy            | Texas    |
| Hospital Corporation of America Houston Healthcare Kingwood         | Kingwood        | Texas    |
| Medical City Lewisville                                             | Lewisville      | Texas    |
| Christus Good Shepherd Medical Center                               | Longview        | Texas    |
| Longview Regional Medical Center                                    | Longview        | Texas    |
| Covenant Children's Hospital                                        | Lubbock         | Texas    |
| Methodist Mansfield Medical Center                                  | Mansfield       | Texas    |
| Medical City of McKinney                                            | McKinney        | Texas    |
| Hospital Corporation of America Houston Healthcare Southeast        | Pasadena        | Texas    |
| Medical City Plano                                                  | Plano           | Texas    |
| Texas Health Presbyterian Hospital Plano                            | Plano           | Texas    |
| Methodist Richardson Medical Center                                 | Richardson      | Texas    |
| Lake Pointe Medical Center                                          | Rowlett         | Texas    |
| Children's Hospital of San Antonio                                  | San Antonio     | Texas    |
| Methodist Children's Hospital                                       | San Antonio     | Texas    |
| Methodist Stone Oak Hospital                                        | San Antonio     | Texas    |
| Metropolitan Methodist Hospital                                     | San Antonio     | Texas    |
| North Central Baptist Hospital                                      | San Antonio     | Texas    |
| St Luke's Baptist Hospital                                          | San Antonio     | Texas    |
| University Hospital San Antonio                                     | San Antonio     | Texas    |
| Baylor Scott and White McLane Children's Medical Center             | Temple          | Texas    |
| Christus St Michael Health System                                   | Texarkana       | Texas    |
| Houston Methodist: The Woodlands Hospital                           | The Woodlands   | Texas    |
| Memorial Hermann: The Woodlands                                     | The Woodlands   | Texas    |
| St Luke's: The Woodlands Hospital                                   | The Woodlands   | Texas    |
| Texas Children's Hospital: The Woodlands                            | The Woodlands   | Texas    |
| Christus Trinity Mother Frances Health System                       | Tyler           | Texas    |
| DeTar Hospital North                                                | Victoria        | Texas    |
| Hospital Corporation of America Houston Healthcare Clear Lake       | Webster         | Texas    |
| Intermountain Medical Center                                        | Murray          | Utah     |
| McKay Dee Hospital Center                                           | Ogden           | Utah     |
| Ogden Regional Medical Center                                       | Ogden           | Utah     |
| Timpanogos Regional Hospital                                        | Orem            | Utah     |
| Utah Valley Regional Medical Center                                 | Provo           | Utah     |
| Dixie Regional Medical Center                                       | Saint George    | Utah     |
| St Mark's Hospital                                                  | Salt Lake City  | Utah     |
| University of Utah Health Sciences Center                           | Salt Lake City  | Utah     |
| University of Vermont Children's Hospital                           | Burlington      | Vermont  |
| Inova Alexandria Hospital                                           | Alexandria      | Virginia |
| Virginia Hospital Center                                            | Arlington       | Virginia |
| University of Virginia                                              | Charlottesville | Virginia |
| Inova Fair Oaks Hospital                                            | Fairfax         | Virginia |
| Inova Children's Hospital                                           | Falls Church    | Virginia |
| Mary Washington Hospital                                            | Fredericksburg  | Virginia |
| Spotsylvania Regional Medical Center                                | Fredericksburg  | Virginia |
| Inova Loudoun Hospital                                              | Leesburg        | Virginia |
| Centra Health, Virginia Baptist Hospital                            | Lynchburg       | Virginia |
| Children's Hospital of the King's Daughters                         | Norfolk         | Virginia |
| Reston Hospital Center                                              | Reston          | Virginia |
| Bon Secours St Mary's Hospital                                      | Richmond        | Virginia |
| Children's Hospital of Richmond at Virginia Commonwealth University | Richmond        | Virginia |
| Chippenham and Johnston-Willis Medical Center, Chippenham Campus    | Richmond        | Virginia |
| Henrico Doctors' Hospital                                           | Richmond        | Virginia |
| Johnston-Willis Hospital                                            | Richmond        | Virginia |
| Carilion Clinic Children's Hospital                                 | Roanoke         | Virginia |
| Winchester Medical Center                                           | Winchester      | Virginia |

**SUPPLEMENTAL TABLE 6** Continued

| Hospital Name                                                  | City        | State         |
|----------------------------------------------------------------|-------------|---------------|
| Sentara Northern Virginia Medical Center                       | Woodbridge  | Virginia      |
| Overlake Hospital Medical Center                               | Bellevue    | Washington    |
| Providence Regional Medical Center Everett                     | Everett     | Washington    |
| Evergreen Health                                               | Kirkland    | Washington    |
| University of Washington Medicine: Valley Medical Center       | Renton      | Washington    |
| Kadlec Regional Medical Center                                 | Richland    | Washington    |
| Swedish Medical Center                                         | Seattle     | Washington    |
| University of Washington Medical Center                        | Seattle     | Washington    |
| Deaconess Hospital                                             | Spokane     | Washington    |
| Providence Sacred Heart Medical Center and Children's Hospital | Spokane     | Washington    |
| MultiCare Health System: Tacoma General Hospital               | Tacoma      | Washington    |
| St Joseph Medical Center                                       | Tacoma      | Washington    |
| Legacy Salmon Creek Hospital                                   | Vancouver   | Washington    |
| PeaceHealth Southwest Medical Center                           | Vancouver   | Washington    |
| Yakima Valley Memorial Hospital                                | Yakima      | Washington    |
| Charleston Area Medical Center                                 | Charleston  | West Virginia |
| Cabell Huntington Hospital, Inc                                | Huntington  | West Virginia |
| Berkeley Medical Center                                        | Martinsburg | West Virginia |
| West Virginia University School of Medicine                    | Morgantown  | West Virginia |
| Ascension NE Wisconsin: St Elizabeth Campus                    | Appleton    | Wisconsin     |
| Aurora Baycare Medical Center                                  | Green Bay   | Wisconsin     |
| St Vincent Hospital                                            | Green Bay   | Wisconsin     |
| Gundersen Lutheran Medical Center                              | La Crosse   | Wisconsin     |
| Meriter Hospital                                               | Madison     | Wisconsin     |
| Sisters of St Mary Health St Mary's Hospital Madison           | Madison     | Wisconsin     |
| Marshfield Medical Center - Marshfield                         | Marshfield  | Wisconsin     |
| Ascension Columbia St Mary's Hospital Milwaukee                | Milwaukee   | Wisconsin     |
| Ascension SE Wisconsin Hospital: St Joseph Campus              | Milwaukee   | Wisconsin     |
| Aurora Sinai Medical Center                                    | Milwaukee   | Wisconsin     |
| Children's Hospital of Wisconsin                               | Milwaukee   | Wisconsin     |
| Children's Hospital of Wisconsin, Fox Valley                   | Neenah      | Wisconsin     |
| Ascension All Saints Hospital                                  | Racine      | Wisconsin     |
| Waukesha Memorial Hospital                                     | Waukesha    | Wisconsin     |
| Aspirus Wausau Hospital                                        | Wausau      | Wisconsin     |
| Aurora Women's Pavilion                                        | West Allis  | Wisconsin     |
